# Supplementary material for: RAD51 and RAD51B Play Diverse Roles in the Repair of DNA Double Strand Breaks in Physcomitrium patens
Source: MDPI journal article supplement (doi:10.3390/genes14020305), 2023-01-24
Supplement: s1 [file s1]

**Figure S1.** Phylogenetic tree of RAD51 superfamily.

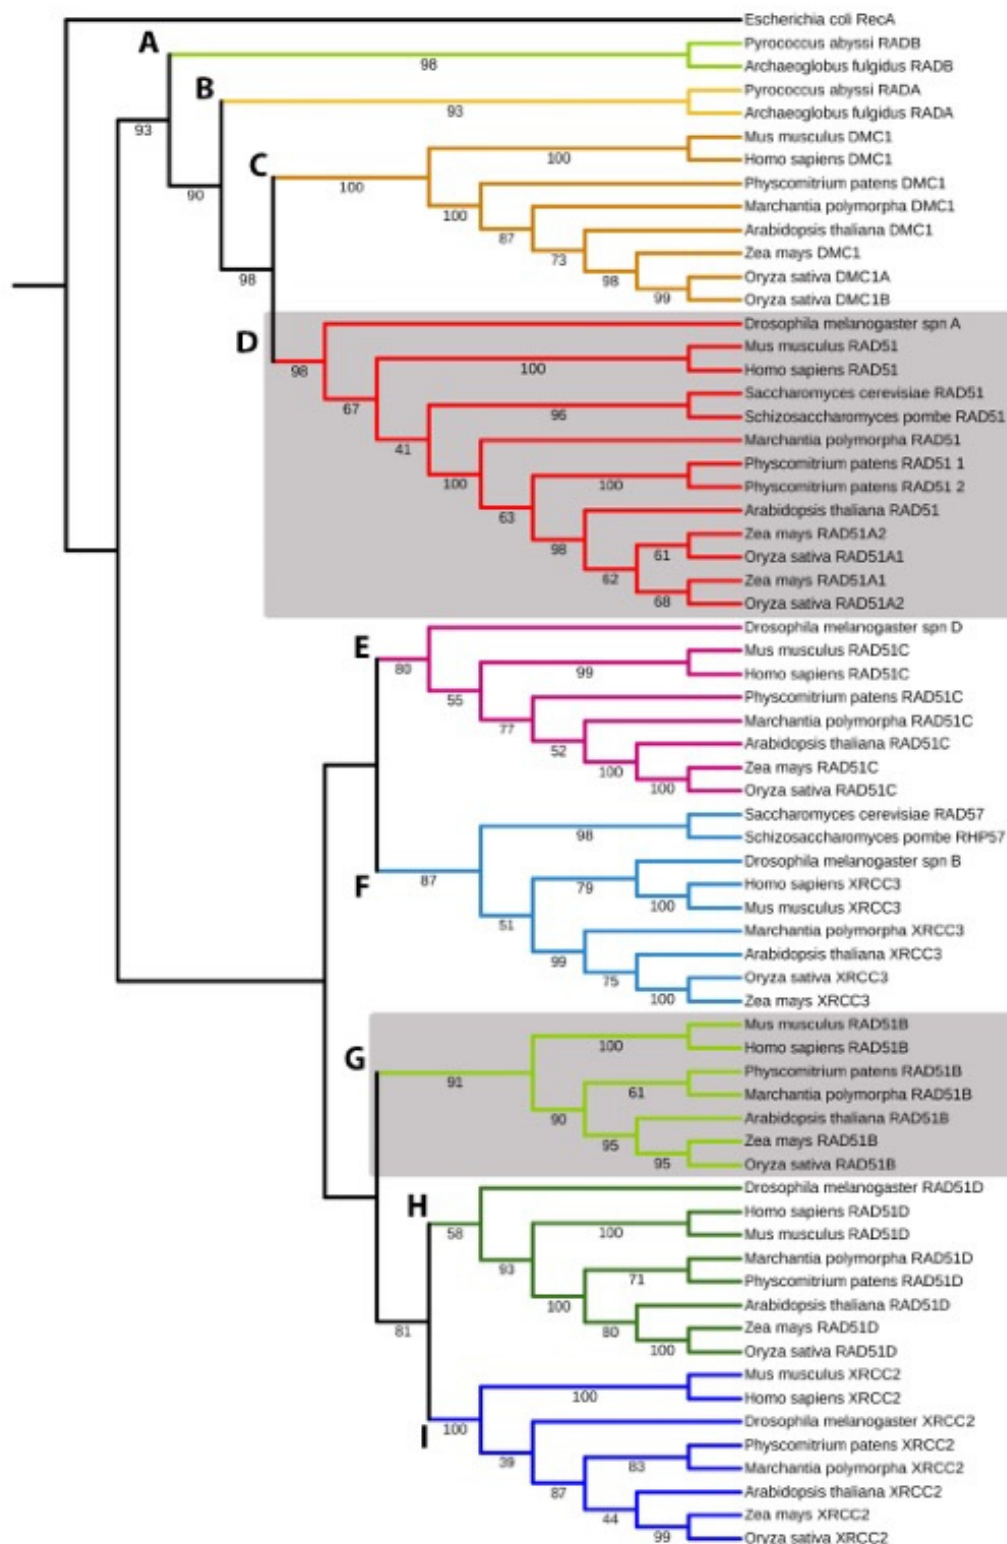

Phylogenetic tree of RAD51 superfamily inferred using maximum likelihood analysis. RecA *E. coli* was used as outgroup. The bootstrap support values are shown on the branch above. The ML log likelihood -34879.737423. The analysis included 65 amino acid sequences and 1,023 positions in the final data set. A. RADB, B. RADA, C. DCM1, D. RAD51 1 and 2, E. RAD51C, F. XRCC3, G. RAD51B, H. RAD51D and I. XRCC2. Grey boxes depicted RAD51 1 and 2 and RAD51B. Accession numbers are listed in Suppl. Table S1.

**Table S1.** Accession numbers of proteins used for construction of phylogenetic tree of RAD51 superfamily.

| Organism                      | Gene name | Accession number                    | Database  |
|-------------------------------|-----------|-------------------------------------|-----------|
| <i>Archaeoglobus fulgidus</i> | RADA      | <a href="#">1484216</a>             | NCBI      |
|                               | RADB      | <a href="#">1485325</a>             | NCBI      |
| <i>Pyrococcus abyssi</i>      | RADA      | <a href="#">AJ248283.1</a>          | NCBI      |
|                               | RADB      | <a href="#">1495005</a>             | NCBI      |
| <i>Arabidopsis thaliana</i>   | RAD51     | <a href="#">AT5G20850</a>           | TAIR      |
|                               | RAD51B    | <a href="#">AT2G28560</a>           | TAIR      |
|                               | RAD51C    | <a href="#">AT2G45280</a>           | TAIR      |
|                               | RAD51D    | <a href="#">AT1G07745.1</a>         | TAIR      |
|                               | XRCC2     | <a href="#">AT5G64520</a>           | TAIR      |
|                               | XRCC3     | <a href="#">AT5G57450</a>           | TAIR      |
|                               | DMC1      | <a href="#">AT3G22880.1</a>         | TAIR      |
| <i>Marchantia polymorpha</i>  | RAD51     | <a href="#">Mapoly0024s0069</a>     | Phytozome |
|                               | RAD51B    | <a href="#">Mapoly0007s0061</a>     | Phytozome |
|                               | RAD51C    | <a href="#">Mapoly0114s0015.1</a>   | Phytozome |
|                               | RAD51D    | <a href="#">Mapoly0014s0028.1</a>   | Phytozome |
|                               | XRCC2     | <a href="#">Mapoly0070s0006.1</a>   | Phytozome |
|                               | XRCC3     | <a href="#">Mapoly0009s0225.1</a>   | Phytozome |
|                               | DMC1      | <a href="#">Mapoly0110s0049.1</a>   | Phytozome |
| <i>Physcomitrium patens</i>   | RAD51_1   | <a href="#">Pp3c11_22000V3.1</a>    | Phytozome |
|                               | RAD51_2   | <a href="#">Pp3c7_7920V3.1</a>      | Phytozome |
|                               | RAD51B    | <a href="#">Pp3c25_15290V3.1</a>    | Phytozome |
|                               | RAD51C    | <a href="#">Pp3c5_12400V3.2</a>     | Phytozome |
|                               | RAD51D    | <a href="#">Pp3c23_10930V3.2</a>    | Phytozome |
|                               | XRCC2     | <a href="#">Pp3c1_6220V3.1</a>      | Phytozome |
|                               | DMC1      | <a href="#">Pp3c20_7190V3.1</a>     | Phytozome |
| <i>Oryza sativa</i>           | RAD51A1   | <a href="#">LOC_Os11g40150.1</a>    | Phytozome |
|                               | RAD51A2   | <a href="#">LOC_Os12g31370.1</a>    | Phytozome |
|                               | RAD51B    | <a href="#">LOC_Os05g03050.1</a>    | Phytozome |
|                               | RAD51C    | <a href="#">LOC_Os01g39630.1</a>    | Phytozome |
|                               | RAD51D    | <a href="#">LOC_Os09g01680.1</a>    | Phytozome |
|                               | XRCC2     | <a href="#">LOC_Os01g64990.2</a>    | Phytozome |
|                               | XRCC3     | <a href="#">LOC_Os02g35450.1</a>    | Phytozome |
|                               | DMC1A     | <a href="#">LOC_Os12g04980.1</a>    | Phytozome |
|                               | DMC1B     | <a href="#">LOC_Os11g04954.1</a>    | Phytozome |
| <i>Zea Mays</i>               | RAD51A1   | <a href="#">Zm00001d041757_T001</a> | Phytozome |
|                               | RAD1A2    | <a href="#">Zm00001d021898_T001</a> | Phytozome |
|                               | RAD51B    | <a href="#">Zm00001d010986_T001</a> | Phytozome |
|                               | Rad51C    | <a href="#">Zm00001d044278_T001</a> | Phytozome |
|                               | Rad51D    | <a href="#">Zm00001d022332_T001</a> | Phytozome |
|                               | XRCC2     | <a href="#">Zm00001d042691_T002</a> | Phytozome |
|                               | XRCC3     | <a href="#">Zm00001d016839_T001</a> | Phytozome |

|                                |        |                                     |           |
|--------------------------------|--------|-------------------------------------|-----------|
|                                | DMC1   | <a href="#">ZmPHJ40.03G333900.1</a> | Phytozome |
| <i>Homo sapiens</i>            | RAD51  | <a href="#">Q06609</a>              | Uniprot   |
|                                | RAD51B | <a href="#">O15315</a>              | Uniprot   |
|                                | RAD51C | <a href="#">O43502</a>              | Uniprot   |
|                                | RAD51D | <a href="#">O75771</a>              | Uniprot   |
|                                | XRCC2  | <a href="#">O43543</a>              | Uniprot   |
|                                | XRCC3  | <a href="#">O43542</a>              | Uniprot   |
|                                | DMC1   | <a href="#">Q14565-1</a>            | Uniprot   |
| <i>Mus musculus</i>            | RAD51  | <a href="#">NP_035364.1</a>         | NCBI      |
|                                | RAD51B | <a href="#">NP_001239491.1</a>      | NCBI      |
|                                | RAD51C | <a href="#">NP_001278369.1</a>      | NCBI      |
|                                | RAD51D | <a href="#">NP_001264867.1</a>      | NCBI      |
|                                | XRCC2  | <a href="#">NP_065595.2</a>         | NCBI      |
|                                | XRCC3  | <a href="#">NP_083151.1</a>         | NCBI      |
|                                | DMC1   | <a href="#">NP_034189.1</a>         | NCBI      |
| <i>Drosophila melanogaster</i> | Spn-A  | <a href="#">NP_524583.1</a>         | NCBI      |
|                                | Spn-D  | <a href="#">NP_733200</a>           | NCBI      |
|                                | RAD51D | <a href="#">NP_610466</a>           | NCBI      |
|                                | XRCC2  | <a href="#">NP_573302.1</a>         | NCBI      |
|                                | Spn-B  | <a href="#">NP_476740.1</a>         | NCBI      |
| <i>S. cerevisiae</i>           | RAD51  | <a href="#">NP_011021.3</a>         | NCBI      |
|                                | RAD57  | <a href="#">NP_010287.1</a>         | NCBI      |
| <i>S. pombe</i>                | RAD51  | <a href="#">CAB90141.1</a>          | NCBI      |
|                                | RHP57  | <a href="#">NP_593627.1</a>         | NCBI      |

NCBI (National Center for Biotechnology Information) <https://www.ncbi.nlm.nih.gov/>;  
TAIR (The Arabidopsis Information Resource) <https://www.arabidopsis.org/>; UniProt  
<https://www.uniprot.org/>; Phytozome (JGI Phytozome 13) <https://phytozome-next.jgi.doe.gov/>

**Table S2.** List of rDNA qPCR primers

| Target         | Primer  | Orientation | Sequence                        |
|----------------|---------|-------------|---------------------------------|
| qPCR 18S rDNA  | Pp18S A | F           | 5' CCTCTAAGAAGTTGGCCGCA 3'      |
|                | Pp18S B | R           | 5' GGCCGTTCTTAGTTGGTGGA 3'      |
| qPCR 5S rDNA   | Pp5S F  | F           | 5' TACCAAGGCTACTACACCAGATC 3'   |
|                | Pp5S R  | R           | 5' AGGTCACCCATCCCAGTACTA 3'     |
| qPCR ubiquitin | PubqFw  | F           | 5' ACTACCCTGAAGTTGTATAGTTCGG 3' |
|                | PubqRev | R           | 5' CAAGTCACATTACTTCGCTGTCTA 3'  |

**Figure S2.** WT, *Pprad51B* and *Pprad51-1-2* response to MMS treatment.

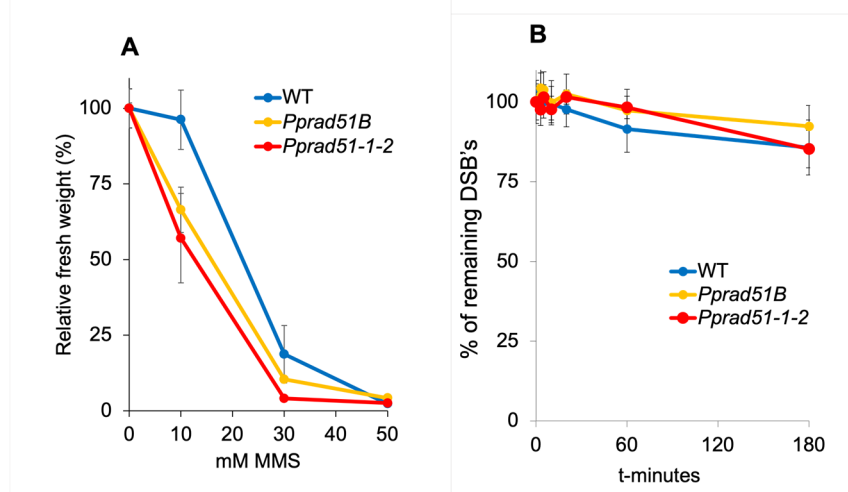

**(A)** Growth response to MMS. Explants of 7d protonemata were treated for 1 hr with 10, 30 and 50 mM MMS. After the treatment, explants were inoculated on Petri plates with drug-free BCDAT medium and weighted after 3 weeks of growth (see legend for Figure 3 in main text). WT and both lines *Pprad51B* and *Pprad51-1-2* are equally sensitive to MMS treatment; Student's t-test:  $P = 0.3000$  and  $P = 0.2400$ , respectively. **(B)** SSBs repair kinetics determined by comet assay. Explants of 7d protonemata were treated with 30 mM MMS for 1 h. Repair kinetics of SSBs was measured by comet assay as % of remaining damage after the 0, 3, 5, 10, 20, 60 and 180 min of repair recovery (see legend for Figure 4 in main text). Error bars indicate SD.
